# Supplementary material for: Modifying the phase and controlling the size of monodisperse ZrO2 nanocrystals by employing Gd3+ as a nucleation agent
Source: Royal Society of Chemistry journal article supplement (doi:10.1039/c1ce05306j), 2011-01-01
Supplement: c1ce05306j.pdf [file c1ce05306j.pdf]

## Supporting information

### Modifying the phase and controlling the size of monodisperse ZrO<sub>2</sub> nanocrystals by employing Gd<sup>3+</sup> as nucleation agent

Feng Huang, Daqin Chen, Jiangcong Zhou and Yuansheng Wang\*

State Key Laboratory of Structural Chemistry, Fujian Institute of Research on the Structure of Matter, Chinese Academy of Sciences, Fuzhou, China

\*Author to whom correspondence should be addressed;

E-mail: [yswang@fjirsm.ac.cn](mailto:yswang@fjirsm.ac.cn)

Tel: +86-591-83705402

Fax: +86-591-83705402

#### 1. Experimental

**Materials:** ZrOCl<sub>2</sub>, GdCl<sub>3</sub>, oleic acid, sodium oleate (NaOA), NaOH, cyclohexane, ethanol and ammonia (15 wt%) were all purchased from Sinopharm Chemical Reagent Company. All chemicals were of analytical grade and used without further purification. Deionized water was used in the reaction.

**Synthesis:** In a typical synthesis, 10 ml aqueous solution of ZrOCl<sub>2</sub> (50 mol/L) was mixed with ethanol (10 mL), oleic acid (10 mL) and NaOA (0.8 g) under thorough stirring. Then, 1 mL ammonia (15 wt%) solution was added to the mixture. After vigorously stirring at room temperature for 10 min, the colloidal solution was transferred into a 25 mL Teflon-lined autoclave, sealed and heated at 200 °C for 24 h. The final products were collected, washed several times with ethanol/cyclohexane, and purified by centrifugation. To introduce Gd<sup>3+</sup> into the reaction system, GdCl<sub>3</sub> with designed concentration (in mol%) was added.

**Characterization:** To study the phase structure of the products, X-ray diffraction

(XRD) analyses were carried out with a powder diffractometer (DMAX2500 RIGAKU) using Cu K $\alpha$  radiation ( $\lambda=0.154$  nm). The microstructure of the samples were observed by a transmission electron microscope (TEM, JEM-2010) equipped with an energy dispersive x-ray spectroscopy (EDS). TEM specimens were prepared by directly drying a drop of a dilute cyclohexane dispersion solution of the products on the surface of a carbon-coated copper grid. The actual chemical compositions were determined by inductively coupled plasma (ICP) technique on a Perkin-Elmer Optima 3300DV spectrometer. The magnetization as a function of the applied magnetic field ranging from -100 to 100 kOe was measured using a Quantum Design PPMS-7 magnetometer. All the measurements were carried out at room temperature. UV absorption of the products dispersed in cyclohexane was measured by a Lambda 900 UV-vis spectrometer. Size distribution analysis was carried out by measuring the diameters of 200 particles.

## 2. Figure S1-S4

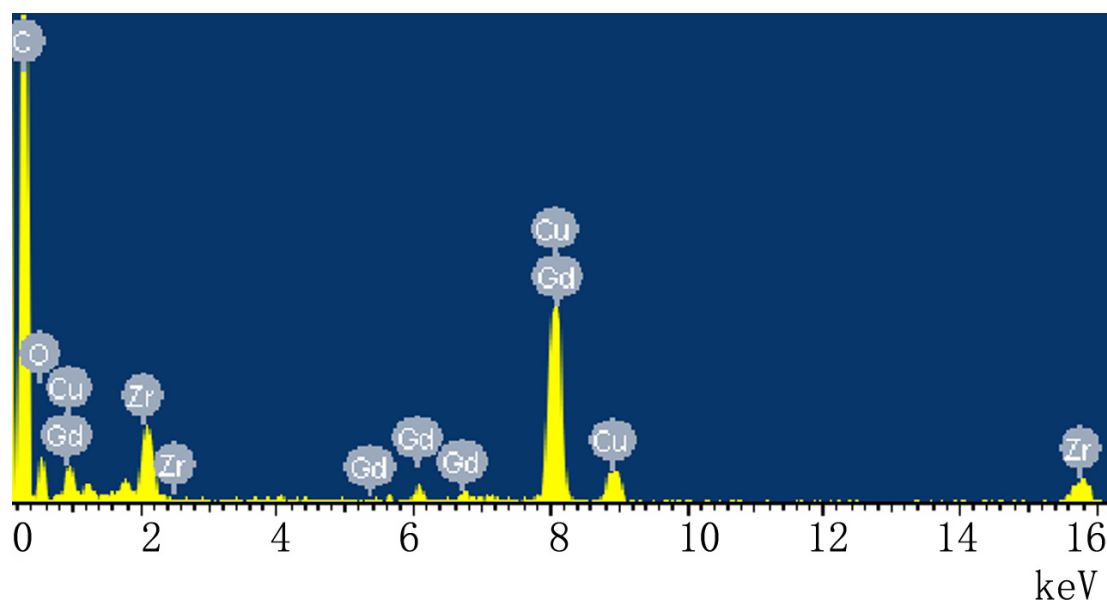

Figure S1. EDS spectrum taken from ZrO<sub>2</sub> nanocrystals synthesized with 5% Gd<sup>3+</sup> addition, which demonstrates the presence of Gd<sup>3+</sup> in ZrO<sub>2</sub> nanocrystals. The Cu and C signal come from the micro-grid.

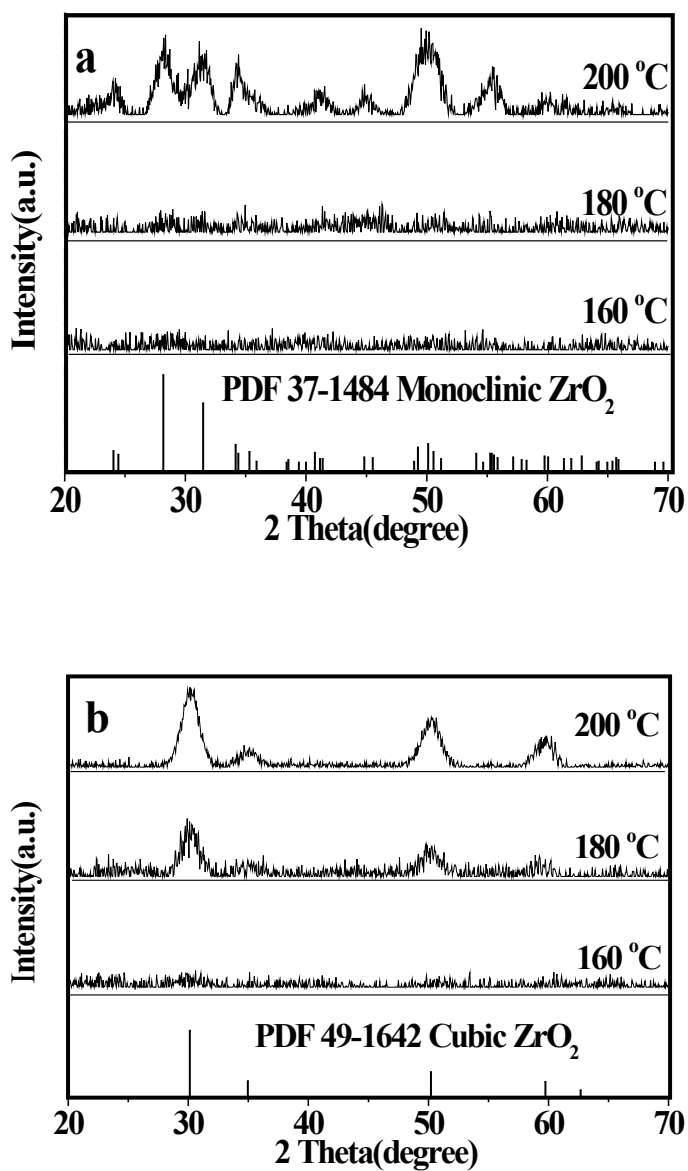

Figure S2. XRD patterns of ZrO<sub>2</sub> products synthesized at various temperatures for 24 h: (a) without Gd<sup>3+</sup> addition, and (b) with 5% Gd<sup>3+</sup> addition; bars at bottom of (a) and (b) represent the standard crystal data of monoclinic (PDF 37-1484) and cubic (PDF 49-1642) ZrO<sub>2</sub> respectively.

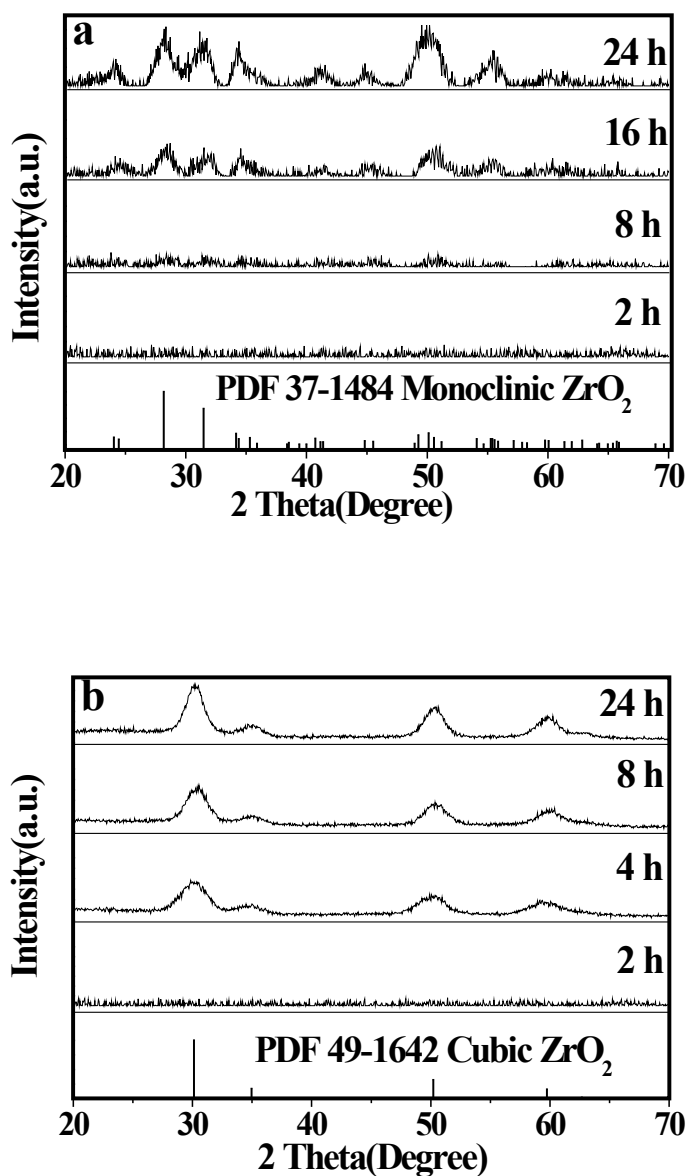

Figure S3. XRD patterns of ZrO<sub>2</sub> products synthesized at 200 °C for various durations: (a) without Gd<sup>3+</sup> addition, and (b) with 5% Gd<sup>3+</sup> addition; bars at bottom of (a) and (b) represent the standard crystal data of monoclinic (PDF 37-1484) and cubic (PDF 49-1642) ZrO<sub>2</sub> respectively.

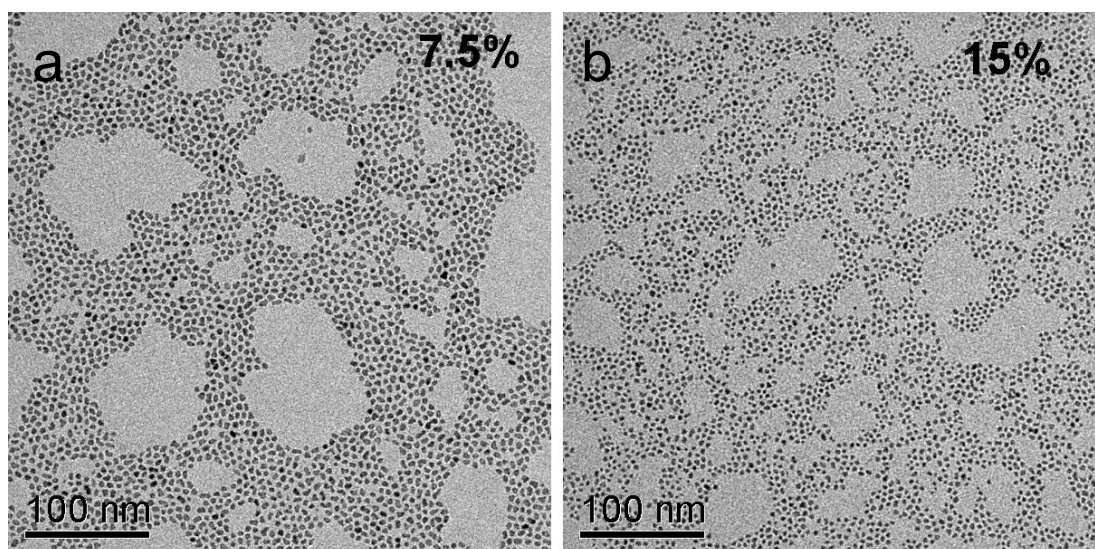

Figure S4. TEM micrographs of cubic ZrO<sub>2</sub> nanocrystals synthesized with (a) 7.5%, and (b) 15% Gd<sup>3+</sup> addition.

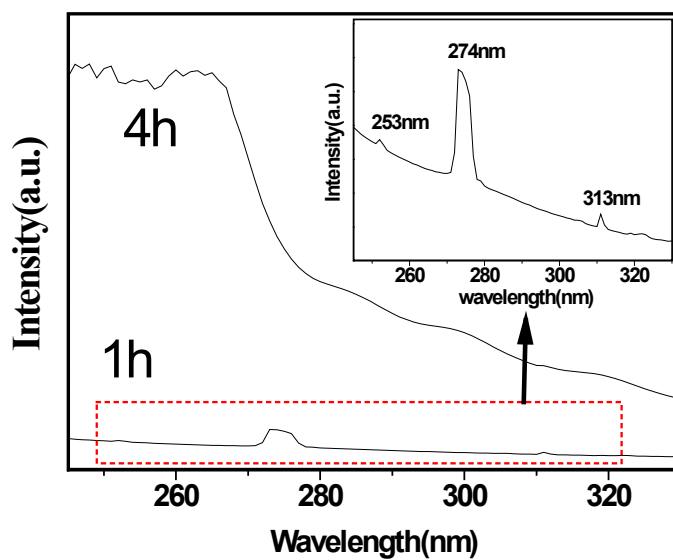

Figure S5. UV absorption spectra of the products having reacted for 1h and 4h in the solution system added with 10 mol% Gd<sup>3+</sup>; inset is the magnified absorption spectrum of the product having reacted for 1h.

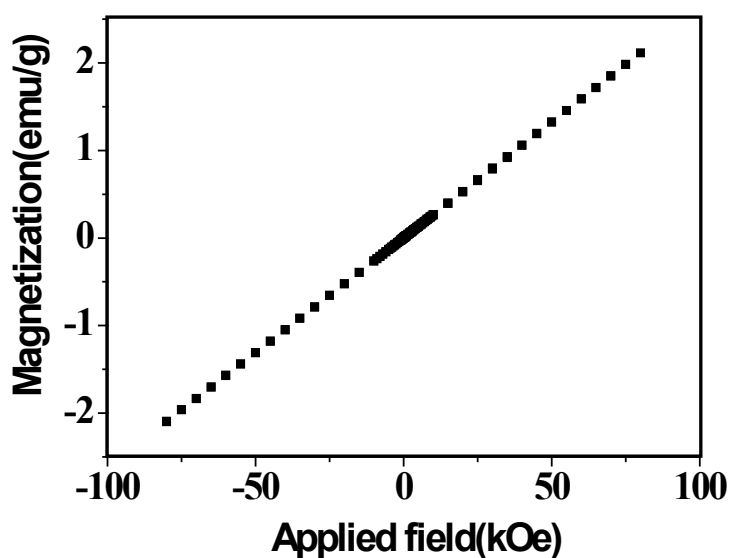

Figure S6. Room temperature magnetization as a function of applied field for cubic  $\text{ZrO}_2$  nanocrystals with 20%  $\text{Gd}^{3+}$ .

### 3. Actual composition analysis

Table S1. Nominal and actual contents of  $\text{Gd}^{3+}$  in the synthesized  $\text{ZrO}_2$  nanocrystals

|          | Nominal $\text{Gd}^{3+}$ content<br>(in mol%) | ICP measured actual Gd content<br>(in mol%) |
|----------|-----------------------------------------------|---------------------------------------------|
| Sample 1 | 10%                                           | 9.4%                                        |
| Sample 2 | 20%                                           | 18.6%                                       |
